# Supplementary material for: Coupling of Two Non-processive Myosin 5c Dimers Enables Processive Stepping along Actin Filaments
Source: Springer Nature journal article supplement (doi:10.1038/srep04907), 2014-05-09
Supplement: 41598_2014_BFsrep04907_MOESM1_ESM.pdf [file 41598_2014_BFsrep04907_MOESM1_ESM.pdf]

**Title: Coupling of Two Non-processive Myosin 5c Dimers Enables Processive Stepping  
along Actin Filaments**

**Authors:**

**Laura K. Gunther<sup>1</sup>, Ken'ya Furuta<sup>3</sup>, Jianjun Bao<sup>1</sup>, Monica K. Urbanowski<sup>1</sup>, Hiroaki  
Kojima<sup>3</sup>, Howard D. White<sup>4</sup> and Takeshi Sakamoto<sup>1,2,\*</sup>**

## **Materials and Methods**

### ***Actin gliding assay***

The actin gliding assay was performed as described in a previous study<sup>1</sup>. An ATP regeneration system containing 100 units/ml pyruvate kinase and 0.1 mM phosphoenolpyruvate was added to the motility buffer (40 mM KCl, 20 mM MOPS pH 7.3, 5 mM MgCl<sub>2</sub>, 0.1 mM EGTA, 5 mM dithiothreitol (DTT)). The velocity of rhodamine-phalloidin labeled F-actin was measured by MetaMorph (Molecular Device) and Origin 8.5 (OriginLab).

### **Movie-1**

**Attachment and dissociation of single Myo5c-HMM molecule on actin filaments.** All movies were captured by three frames/second and are 4 times faster than real speed.

### **Movie-2**

**The movement of Myo5c-HMM-DNA<sub>36</sub> on actin filaments.**

### **Movie-3**

**The movement of Myo5c-HMM-DNA<sub>18</sub> on actin filaments.**

## Figures

### Supplemental Figure S1.

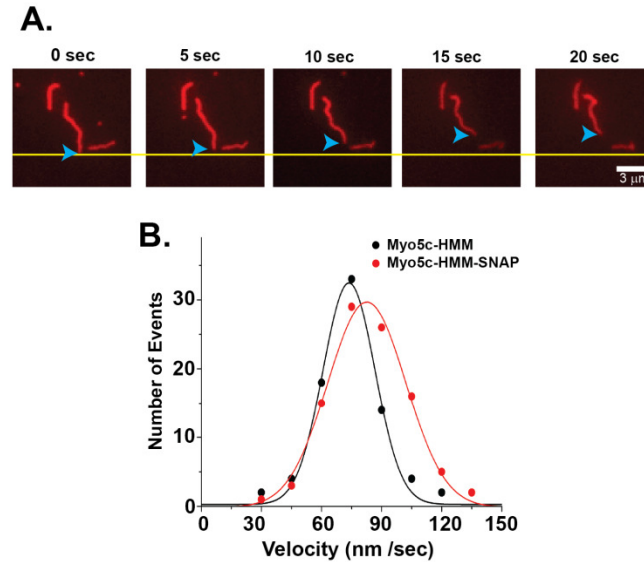

**Supplemental Figure S1.** (A) Sequential images of actin gliding over Myo5c-HMM. Yellow lines represent the starting point of the movement of the actin filament. Actin filaments were labeled by Rhodamine-Phalloidin (red). Blue arrow heads represent the position of the end of the actin filament. Scale bar: 3 μm. (B) Histogram of the velocity of actin filaments for Myo5c-HMM with (black circles) and without (red circles) SNAP tag. The data were fit with a single Gaussian function. The average velocities (means ± S.D.) of Myo5c-HMM and Myo5c-HMM-SNAP were  $73.7 \pm 15$  (n = 77) and  $82.6 \pm 26$  (n = 97) nm/s, respectively.

## Supplemental Figure S2.

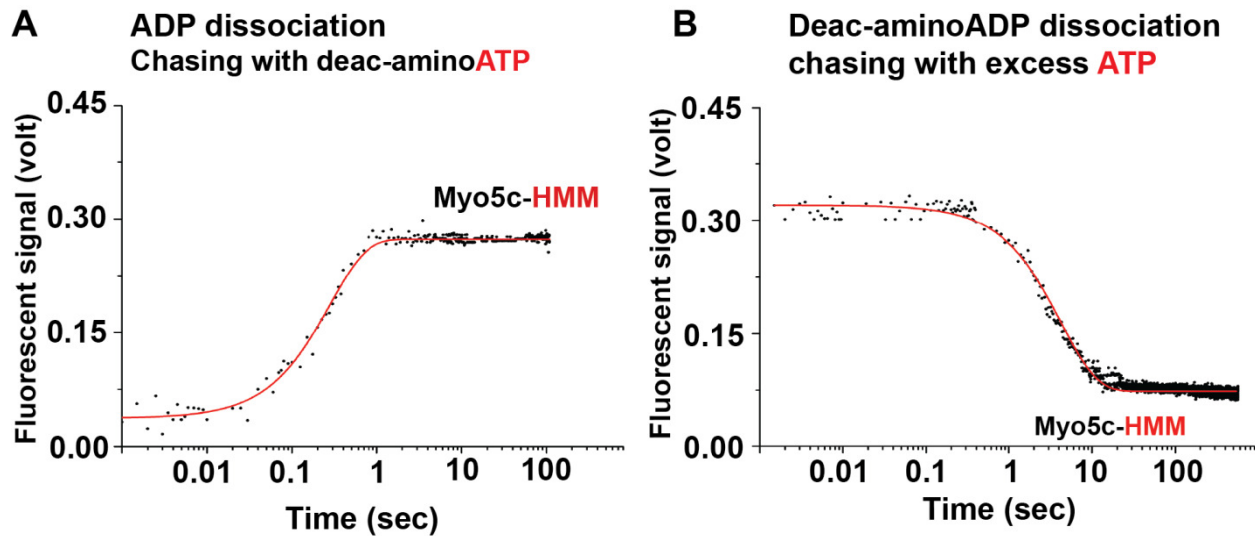

Supplemental Figure S2. ADP dissociation and deac-aminoADP dissociation from actomyosin 5c-HMM by excess deac-aminoATP (800  $\mu\text{M}$ ) or ATP (1 mM). (A) ADP dissociation from actomyosin 5c-HMM with excess deac-aminoADP (800  $\mu\text{M}$ ). The data are the average of three traces and were fit with single exponential function (red line) with a rate of  $13.5 \pm 1.1 \text{ s}^{-1}$  and an amplitude of 0.26. (B) Deac-aminoADP dissociation from actomyosin 5c-HMM with excess ATP (1 mM). The data are the averaged of three traces and were fit with a single exponential function (red line) with a rate of  $0.29 \pm 0.09 \text{ s}^{-1}$  and an amplitude 0.27.

## Supplemental FigureS3

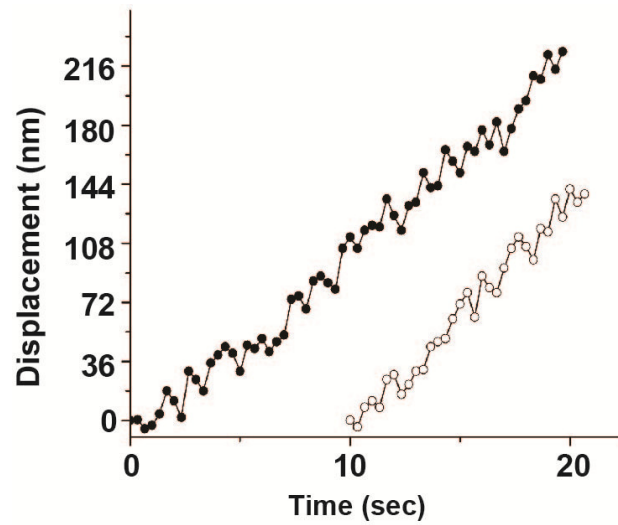

Supplemental Figure S3. Stepping traces of Cy3-Myo5c-HMM-dDNA<sub>6,8</sub>.

- 1 Sakamoto, T. *et al.* Neck length and processivity of myosin V. *J Biol Chem* **278**, 29201-29207, doi:10.1074/jbc.M303662200

M303662200 [pii] (2003).
